# Supplementary material for: Distilling the essence of appraisal: a mixed methods study of people with multiple sclerosis
Source: Springer Nature journal article supplement (doi:10.1007/s11136-015-1119-z), 2015-09-05
Supplement: MOESM3 [file 793772]

**Text to Accompany Supplementary Tables**

**Coding the QOL Appraisal Profile.** The open-ended data were coded by at least two trained coders, and inter-rater agreement was moderately high (mean kappa 0.65 on a scale from -1.0 to 1.0). The *QOL Definition* text data were coded according to a standardized protocol [[1](#_ENREF_1)] that is consistent with consolidated criteria for reporting qualitative research (COREQ)[[2](#_ENREF_2)]. Themes were originally derived from an extensive sorting procedure [[3](#_ENREF_3)] and therefore identified in advance.

Coded QOL Definition themes are shown in Supplementary Table 1; attributes were coded as “0” if they were not reflected in the individual’s written text response, and “1” if they were reflected in the individual’s written text response. Complexity-related themes were coded 1-3 (1 = first option; 2=second option, 3=both options reflected), but were not relevant to and thus not included in the present analyses.

Goal themes were rated on a series of seven items describing goal content: (1) what are the main things you want to accomplish?; (2) what are the main problems you want to solve; (3) what situations do you want to prevent or avoid?; (4) what things do you want to keep the same as they are now?; (5) what things do you want to accept as they are?; (6) what demains and responsibilities do you want to let go of or reduce? Coded goal attributes are listed in Supplementary Table 1. For each of an individual’s goal statements, items were coded as “0” if they were not relevant to the individual’s written text response; and “1” if they were reflected in the individual’s written text response. The seven goal items were summed, resulting in scores that ranged from 0 to 7 for each of the goal theme codes. [Readers interested in more detail on the coding methods are referred to the User Manual for the QOL Appraisal Profile [[1](#_ENREF_1)], which can be obtained by contacting the present authors.]

INSERT SUPPLEMENTARY TABLE 1 ABOUT HERE

For this analysis, we began the coding process by having all raters code ten participants’ data and discussing differences across raters. We then had all raters code the next ten participants’ data and there were almost no differences across raters. This calibration exercise made us feel comfortable proceeding without further adjudication. As this content analysis was unfunded work, we did not have the requisite resources to adjudicate all coding. In working with the coded data, therefore, we dealt with any differences in a conservative manner: we used only those codes on which both raters agreed. Thus, the scores used reflected the themes with the strongest ‘signal’ on a given theme in the text data being analyzed. This approach also had the effect of reducing the number of different QOL themes attributed to different individuals.

**MANOVA Results**

**PCS Results.** Results of the preliminary MANOVAs to identify key appraisal variables for inclusion in an overall MANOVA revealed 18 appraisal variables that were significantly different across three levels of expected PCS, 17 variables that differed across three levels of residual PCS, and 5 variables associated with the expected by residual interaction term (see Supplementary Table 3.)

INSERT SUPPLEMENTARY TABLE 3 ABOUT HERE

**PS Summary Results.** Results of the preliminary MANOVAs to identify key appraisal variables for inclusion in an overall MANOVA revealed 19 appraisal variables that were significantly different across three levels of expected PS Summary, 23 variables that differed across three levels of residual PS Summary, and 3 variables associated with the expected by residual interaction term (see Supplementary Table 3.)

**MCS Results.** Results of the preliminary MANOVAs to identify key appraisal variables for inclusion in an overall MANOVA revealed 13 appraisal variables that were significantly different across three levels of expected MCS, 28 variables that differed across three levels of residual MCS, and 4 variables associated with the expected by residual interaction term (see Supplementary Table 3.)

**Differences in Appraisal Associated with Expected Levels of Functioning.**

**PCS Results.** Supplementary Table 4 shows a comparison of means by appraisal item across groups characterized by expected baseline PCS and expected change in PCS. Patients whose physical function was expected to be poor at baseline tended to focus less on work, financial concerns, and relationships. They were more likely to give poorly articulated responses when asked about personal goals (non-answers), perhaps reflective of a greater degree of cognitive impairment. They were also somewhat less likely to evaluate their physical functioning against the kind of life toward which they have been working. These individuals reported that they focused on recent flare-ups when rating PCS. They also indicated giving greater weight to areas in which they need help. However, they also indicate that they place less emphasize of things they are worried about, perhaps consistent with the lower number of personal goals they report in many areas.

INSERT SUPPLEMENTARY TABLE 4 ABOUT HERE

In contrast, people expected to have better physical functioning tended to mention specific problems and also to emphasize past experiences more than other groups. They placed less emphasis on independent functioning with greater focus on goals related to travel, work and education. Their responses to PCS questions tended to focus on recent experiences, evaluated in terms of the kind of life that they want to have. They placed less emphasis on difficulties and help needed. Consistent with their focus on attaining self-defined goals, they indicated that they placed great emphasis on own priorities in rating QOL.

**PS Summary Results.** Supplementary Table 5 shows a comparison of means by appraisal item across groups characterized by expected baseline PS Summary and expected change in PS Summary. Patients whose MS-related disability was expected to be poor at baseline tended to focus goals on financial concerns, relationships, travel, work and unemployment, and were less likely to focus goals on independent functioning or to give poorly articulated responses when asked about personal goals. They tended to sample experiences more related to relationships, and seeking not to complain. They focused on the life they were working toward, how well they were doing rather than how hard it has been, what was important to themselves and not others, and recent concerns, but not help needed. There were no differences related to QOL definition

INSERT SUPPLEMENTARY TABLE 5 ABOUT HERE

**MCS Results.** Supplementary Table 6 shows a comparison of means by appraisal item across groups characterized by expected baseline MCS and expected change in MCS Summary. People whose MCS was expected to be poor at baseline tended to focus on goals related to education, and to sample experiences that reflected worse moments, recent flare-ups, a focus on MS, and the seriousness of the situation. They compared themselves to their ideal of perfect health, a time before their MS; and emphasized the way things usually are, how hard it has been, and things that are disappointing. Those whose MCS was expected to be good at baseline focused on goals related to work and unemployment; compared themselves to others with MS, and emphasized things they were proud of. There were no differences related to QOL definition.

INSERT SUPPLEMENTARY TABLE 6 ABOUT HERE

In contrast, people expected to have better mental health functioning tended to mention goals related to work and unemployment. They tended to compare themselves with other people with MS, and tended to focus on things they were proud of.

**Differences in Appraisal Associated with Residual Levels of Functioning.**

**PCS Results.** Supplementary Table 4 shows a comparison of means by appraisal item across groups characterized by residual PCS. Patients whose PCS ratings were worse than expected mentioned a greater number of goals related to health in general, MS in particular, and mental health and mood state. They were less likely to mention goals related to self-image and personality. Residual PCS was also related to the kinds of experiences worse-than-expected patients recall when asked about their QOL, in particular recent flare-ups, concerns related to MS, their worst moments when reporting their QOL, and the seriousness of their situation. In rating their QOL, the worse-than-expected patients were more likely to compare their current situation with a time before they had MS, and to consider as salient difficulties encountered, help needed, disappointments, long-time concerns, and priorities that remain unfinished.

Patients reporting better-than-expected PCS stood out from the other two groups in several ways. They mentioned significantly fewer personal goals related health, independence and MS. Rather, their better than expected report of physical functioning was associated with concerns about their self-image and personality. Patients in this group indicated that they were much less likely to recall negative experiences related to health. Disappointments, need for help and lingering concerns were markedly less salient to this group.

Among patients whose ratings of PCS were in line with expectations, most appraisal measures either fell in an intermediate range between the two other groups or were closer to one extreme or the other. One exception is that these patients were more likely to bring up goals related to MS than the other two groups. This may indicate a willingness to deal with their illness more directly, compared to patients who either over or under-estimate their level of functioning.

**PS Summary Results.**  Supplementary Table 5 shows a comparison of means by appraisal item across groups characterized by residual PS Summary ratings. People whose PS Summary ratings were worse than expected mentioned fewer goals related to independent functioning, living situation or housing, and MS-related goals. Residual PS Summary scores were also related to the kinds of experiences worse-than-expected patients recall when asked about their QOL, in particular they focused less on their worst moments, recent flare-ups, concerns related to MS, their relationships, and the seriousness of their situation, and focused more on emphasizing the positive. In rating their QOL, the worse-than-expected patients were less likely to compare their current situation with others without health limits, things their doctor told them, their ideal of a perfect health, the way others see them, and a time before they had MS. They focused less on big changes, how hard it has been, disappointments, things that worry them, recent and long-time concerns, help needed, and priorities that remain unfinished; but more on how well they are doing.

**MCS Results.** Supplementary Table 6 shows a comparison of means by appraisal item across groups characterized by residual MCS ratings. People whose MCS ratings were worse than expected mentioned more goals related to independent functioning, mental health and mood state, and work and unemployment. They were more likely to sample experiences related to worse moments, the past few weeks, recent flare-ups, focused on MS, and the seriousness of the situation. They tended to compare themselves to other people living with MS, people without health limits, things their doctor told them, their ideal of perfect health, the way others see them, most people their age, and a time in their past before MS. They tended to emphasize big changes, how hard it has been, things that are disappointing, things that worry, long-time concerns, help needed from others, and t things that are unfinished.

In contrast, people whose MCS ratings were better than expected tended to endorse goals related to religiousness or spirituality, sampled experiences emphasizing the positive or balancing positives and negatives, as well as first reactions, and trying not to complain too much. They emphasized how well they were doing, things that make them calm, and things that are settled.

**References**

1. Rapkin, B.D., et al., *User Manual for the Quality of Life Appraisal Profile*, 2011, DeltaQuest Foundation, Inc.: Concord, MA.

2. Tong, A., P. Sainsbury, and J. Craig, *Consolidated criteria for reporting qualitative research (COREQ): a 32-item checklist for interviews and focus groups.* International Journal for Quality in Health Care, 2007. **19**(6): p. 349-357.

3. Li, Y. and B. Rapkin, *Classification and regression tree analysis to identify complex cognitive paths underlying quality of life response shifts: A study of individuals living with HIV/AIDS.* Journal of Clinical Epidemiology, 2009. **62**: p. 1138-1147.
